# Supplementary material for: Ce-doped MoS2−xnanoflower arrays for electrocatalytic nitrate reduction to ammonia
Source: Royal Society of Chemistry journal article supplement (doi:10.1039/d2qi01798a), 2023-01-01
Supplement: d2qi01798a1.pdf [file d2qi01798a1.pdf]

## Experimental Section

### Materials

All the reagents were of analytical grade and were used as received without further purification.  $\text{Ce}(\text{NO}_3)_3 \cdot 6\text{H}_2\text{O}$  ( $\geq 99.0\%$ ),  $\text{Na}_2\text{MoO}_4 \cdot 2\text{H}_2\text{O}$  ( $\geq 99.0\%$ ), thiourea ( $\geq 99.0\%$ ),  $\text{Na}_2\text{SO}_4$  ( $\geq 99.0\%$ ),  $\text{NaNO}_3$  ( $\geq 99.0\%$ ),  $\text{C}_7\text{H}_6\text{O}_3$  ( $\geq 99.5\%$ ),  $\text{NaOH}$  ( $\geq 96\%$ ),  $\text{KNaC}_4\text{H}_{12}\text{O}_{10} \cdot 4\text{H}_2\text{O}$  ( $\geq 99.9\%$ ),  $\text{NaClO}$  ( $\geq 99.9$  wt %),  $\text{NaNO}_2$  ( $\geq 99.0\%$ ),  $\text{NH}_4\text{Cl}$  ( $\geq 99.5\%$ ),  $\text{C}_{12}\text{H}_{14}\text{N}_2 \cdot 2\text{HCl}$  ( $\geq 99.0\%$ ),  $\text{C}_6\text{H}_8\text{N}_2\text{O}_2\text{S}$  ( $\geq 99.5\%$ ) were provided from Sigma-Aldrich Chemical Reagent Co., Ltd. and Sinopharm Chemical Reagent Co., Ltd.

### Synthesis of Ce-MoS<sub>2-x</sub> nanosheets

A piece of carbon cloth (CC, 2 cm × 4 cm) was ultrasonically treated in concentrated HCl for 2 h, followed by cleaning with ethanol and distilled water several times. Then, 4 mmol of thiourea and 1 mmol of  $\text{NaMoO}_4 \cdot 2\text{H}_2\text{O}$  were dissolved in 40 mL of deionized water under stirring for 10 min, followed by addition of 0.1 mmol of  $\text{Ce}(\text{NO}_3)_3 \cdot 6\text{H}_2\text{O}$  under stirring for another 10 min. The mixed solution was then transferred into a Teflon-lined stainless-steel autoclave, followed by immersing the pretreated CC in the solution. The autoclave was sealed and maintained at 220 °C for 24 h. After cooling to room temperature, the obtained Ce-MoS<sub>2-x</sub>/CC was washed with deionized water and ethanol several times, and dried at 60 °C overnight. For comparison, the pristine MoS<sub>2</sub>/CC was prepared by the same procedure without addition of  $\text{Ce}(\text{NO}_3)_3 \cdot 6\text{H}_2\text{O}$ .

### Electrochemical experiments

Electrochemical measurements were tested on a CHI-660E electrochemical workstation in a three-electrode configuration including working electrode (Ce-MoS<sub>2</sub>/CC), reference electrode (Hg/HgO), and counter electrode (platinum foil). All potentials were referenced to reversible hydrogen electrode (RHE) by following equation:  $E_{(\text{RHE})} = E_{(\text{Hg}/\text{HgO})} + (0.098 + 0.0591 \times \text{pH})$ . The area of the working electrode immerse in electrolyte is 1 cm<sup>2</sup>. The whole experiment was conducted under ambient conditions. The aqueous and gas product were detected by the colorimetric

---

methods and gas chromatography (GC), respectively. The detailed determination procedures are given in our previous publication[1].

### ***Calculations of NH<sub>3</sub> yield and Faradaic efficiency***

$$\text{NH}_3 \text{ yield} = (c \times V) / (17 \times t \times A) \quad (1)$$

$$\text{FE} = (8 \times F \times c \times V) / (17 \times Q) \times 100\% \quad (2)$$

where  $c$  ( $\mu\text{g mL}^{-1}$ ) is the measured  $\text{NH}_3$  concentration,  $V$  (mL) is the volume of electrolyte in the cathode chamber (30 mL),  $t$  (s) is the electrolysis time and  $A$  is the surface area of CC ( $1 \times 1 \text{ cm}^2$ ),  $F$  ( $96500 \text{ C mol}^{-1}$ ) is the Faraday constant,  $Q$  (C) is the total quantity of applied electricity.

### **Characterizations**

X-ray diffraction (XRD) pattern was recorded on a Rigaku D/max 2400 diffractometer. Scanning electron microscopy (SEM) was carried out on a JSM-6701 microscope. Transmission electron microscopy (TEM), high-resolution transmission electron microscopy (HRTEM), selected area electron diffraction (SAED) and high-angle annular dark field (HAADF) were performed on a Tecnai G<sup>2</sup> F20 microscope. X-ray photoelectron spectroscopy (XPS) analysis was performed on a PHI 5702 spectrometer. Electron paramagnetic resonance (EPR) measurements were performed on a Bruker ESP-300 spectrometer. UV-vis absorption spectra were measured on MAPADA ULM 1912006 UV-vis spectrophotometer.

### **Calculation details**

DFT calculations were carried out using a Cambridge sequential total energy package (CASTEP).[2] The Perdew-Burke-Ernzerhof (PBE) generalized gradient approximation (GGA) functional was used for the exchange-correlation potential. The DFT-D correction method was considered for van der Waals forces. During the geometry optimization, the convergence tolerance was set to be  $1.0 \times 10^{-5}$  eV for energy and  $0.02 \text{ eV \AA}^{-1}$  for force. The Brillouin zone was sampled in a  $1 \times 1 \times 1$  mesh. The electron wave functions were expanded using plane waves with a cutoff energy of 520 eV.  $\text{MoS}_2$  (001) was modeled by a  $4 \times 4$  supercell, and a vacuum region of 15  $\text{\AA}$  was used to separate adjacent slabs.

The free energies ( $\Delta G$ , 298 K) for each reaction were given after correction:

---

$$\Delta G = \Delta E + \Delta ZPE - T\Delta S \quad (3)$$

where  $\Delta E$  is the adsorption energy,  $\Delta ZPE$  is the zero-point energy difference and  $T\Delta S$  is the entropy difference between the gas phase and adsorbed state.

For MD simulations, the electrolyte system was modeled by a cubic cell with placing catalyst at the center of the cell and randomly filling 2000 H<sub>2</sub>O, 36 NO<sub>3</sub><sup>-</sup> and 36 Na<sup>+</sup>. The force field type was chosen as universal. After geometry optimization, the MD simulations were performed in an NVT ensemble (298 K) with the total simulation time of 1 ns at a time step of 1 fs.

The radial distribution function (RDF) is calculated as

$$g(r) = \frac{dN}{4\pi\rho r^2 dr} \quad (4)$$

where  $dN$  is the amount of N<sub>2</sub> in the shell between the central particle  $r$  and  $r+dr$ ,  $\rho$  is the number density of N<sub>2</sub>.

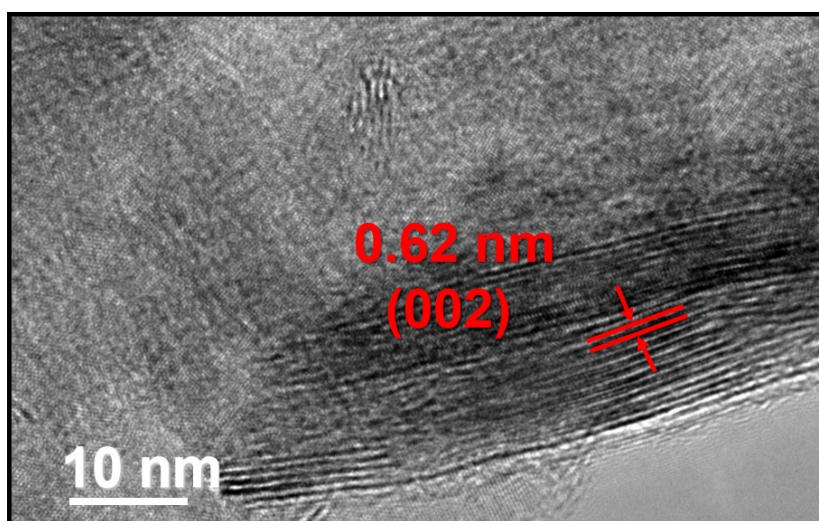

Fig. S1. HRTEM image of pristine MoS<sub>2</sub>.

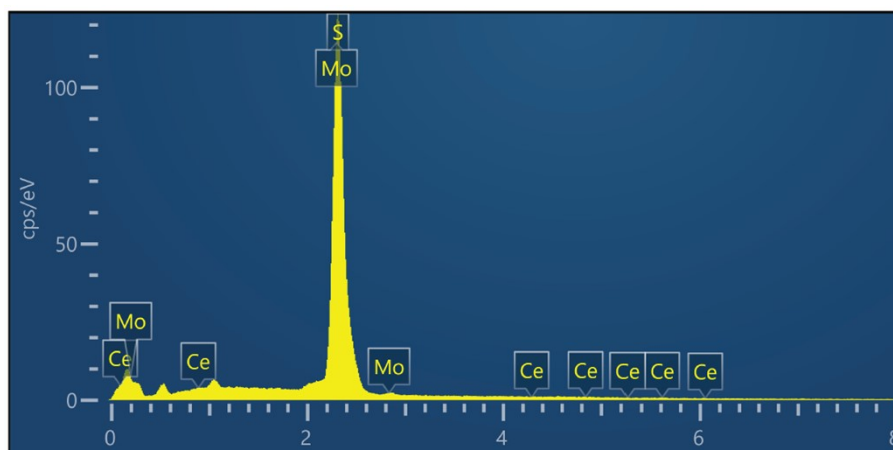

Fig. S2. EDS spectrum of Ce-MoS<sub>2-x</sub>/CC.

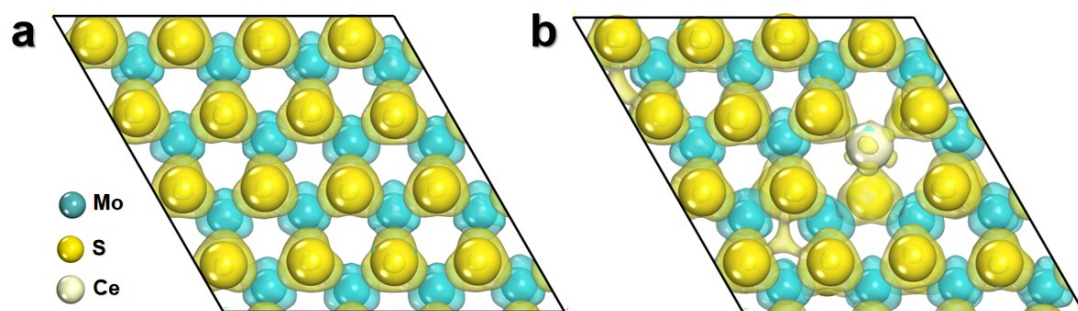

Fig. S3. Charge density distributions of (a) MoS<sub>2</sub> and (b) Ce-MoS<sub>2-x</sub>. Yellow and cyan regions correspond to the electron accumulation and depletion, respectively.

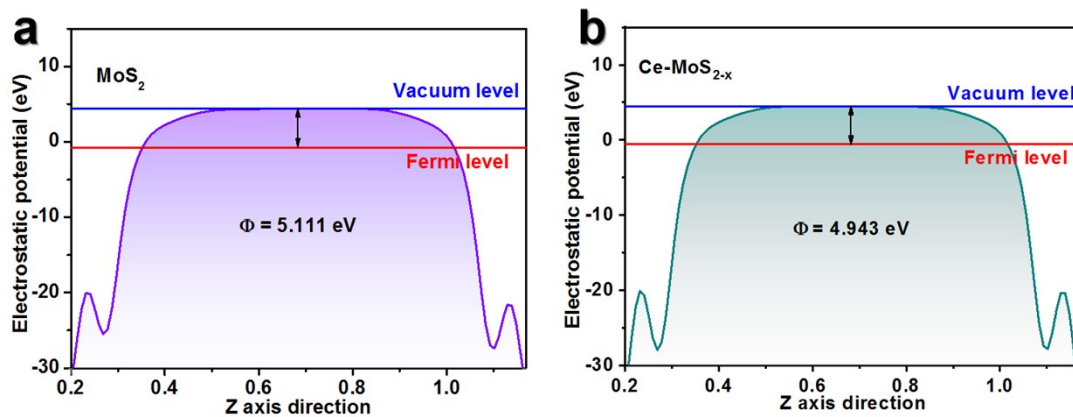

Fig. S4. Average potential profiles along c-axis direction for calculating the work functions of (a) MoS<sub>2</sub> and (b) Ce-MoS<sub>2-x</sub>.

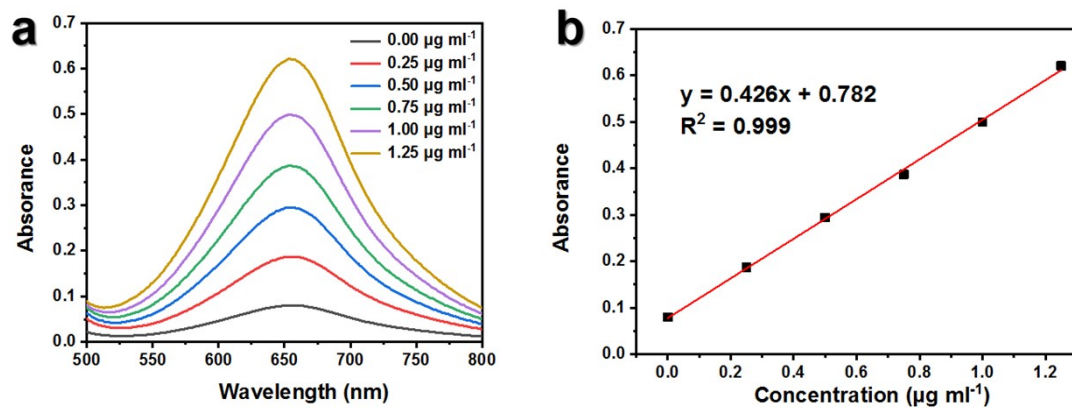

Fig. S5. (a) UV-vis absorption spectra of  $\text{NH}_4^+$  assays after incubated for 2 h at ambient conditions. (b) Calibration curve used for calculation of  $\text{NH}_4^+$  concentrations.



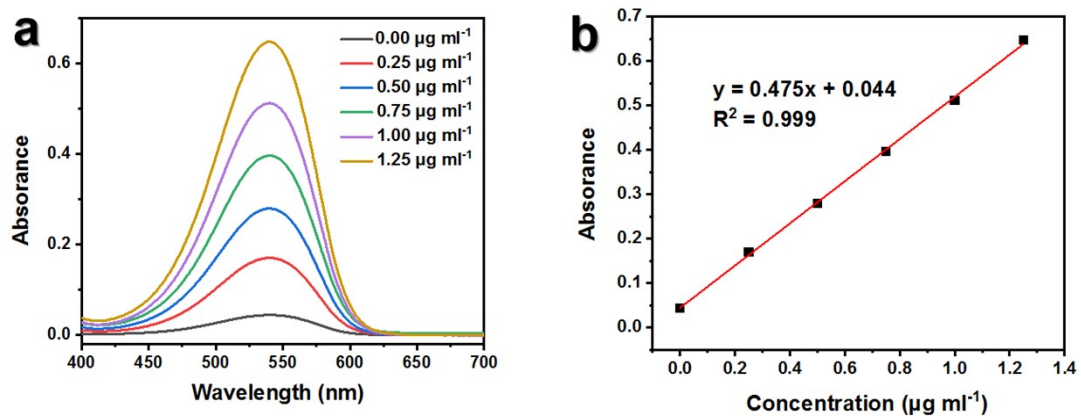

Fig. S6. (a) UV-vis absorption spectra of  $\text{NO}_2^-$  assays after incubated for 20 min at ambient conditions. (b) Calibration curve used for calculation of  $\text{NO}_2^-$  concentrations.

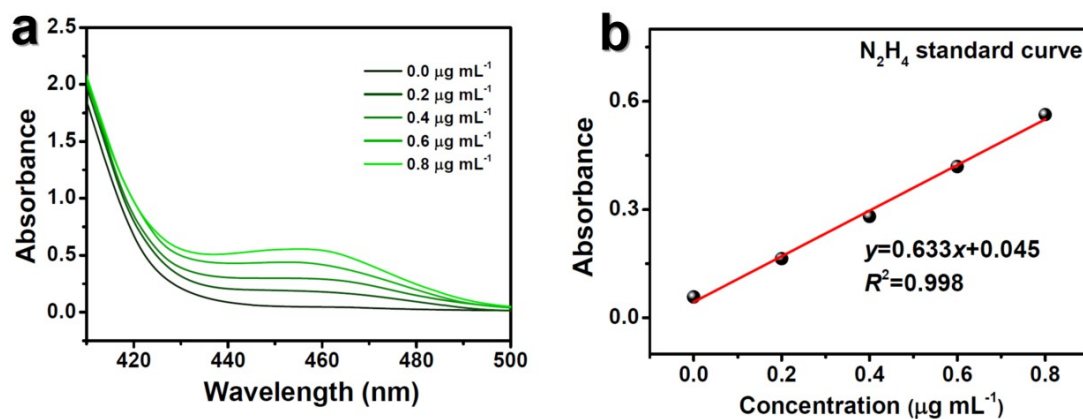

Fig. S7. (a) UV-vis absorption spectra of  $N_2H_4$  assays after incubated for 20 min at ambient conditions. (b) Calibration curve used for calculation of  $N_2H_4$  concentrations.

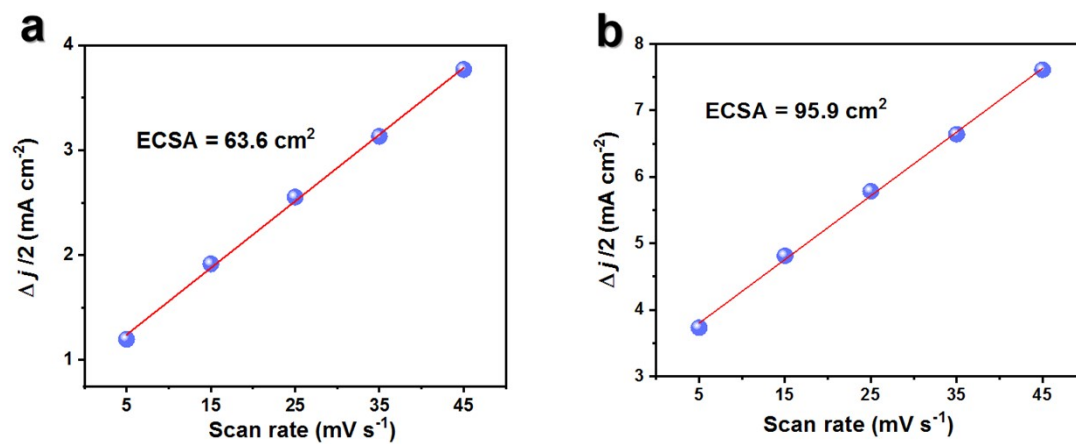

Fig. S8. Electrochemically active surface area measurements at different scanning rates of 5~45 mV s<sup>-1</sup> for (a) MoS<sub>2</sub>/CC and (b) Ce-MoS<sub>2-x</sub>/CC.

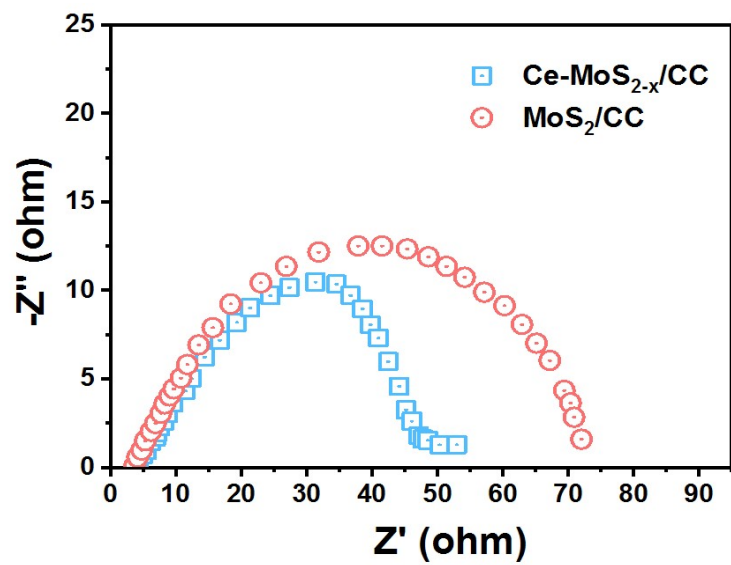

Fig. S9. Electrochemical impedance spectra of MoS<sub>2</sub>/CC and Ce-MoS<sub>2-x</sub>/CC.

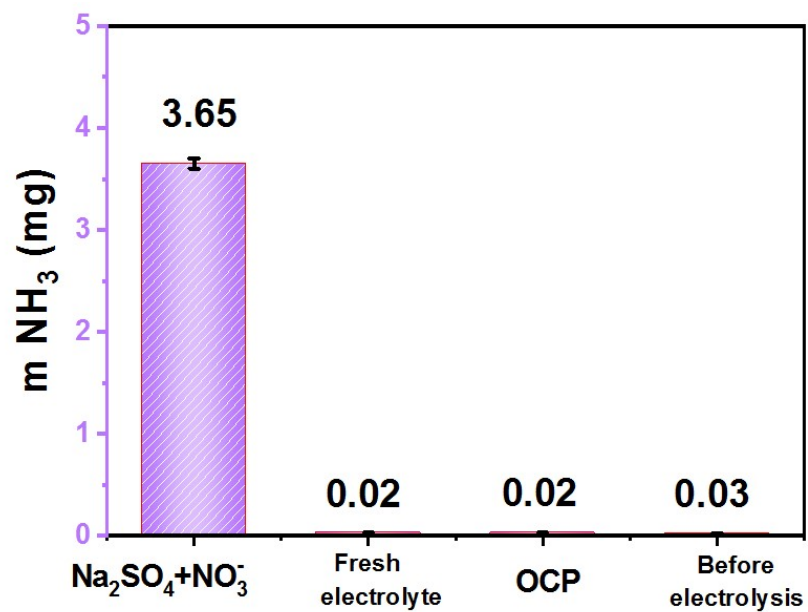

Fig. S10. Produced NH<sub>3</sub> of Ce-MoS<sub>2-x</sub>/CC under different conditions at -0.7 V.

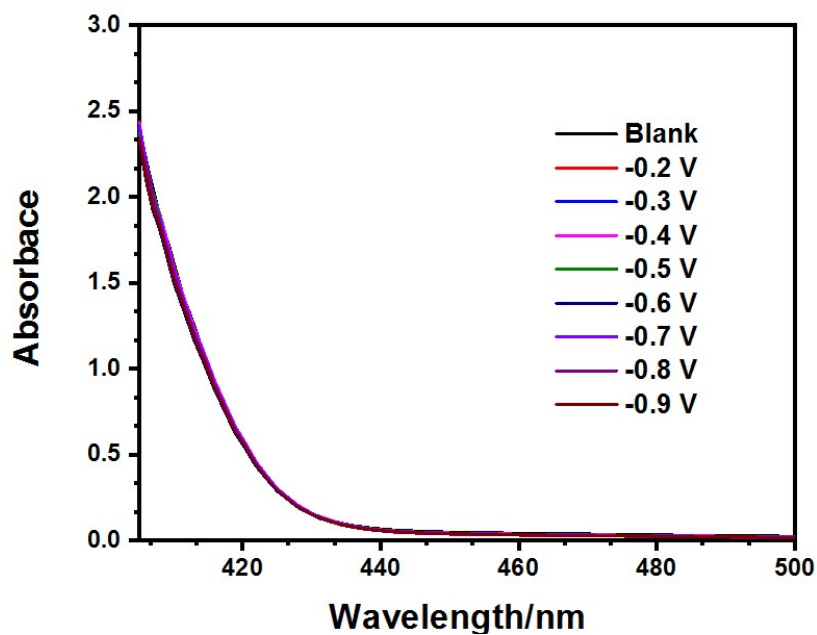

Fig. S11. UV-vis spectra of the electrolytes (stained with the chemical indicator based on the method of Watt and Chrisp) after 1h  $\text{NO}_3\text{RR}$  electrolysis on  $\text{Ce-MoS}_{2-x}/\text{CC}$  at various potentials.

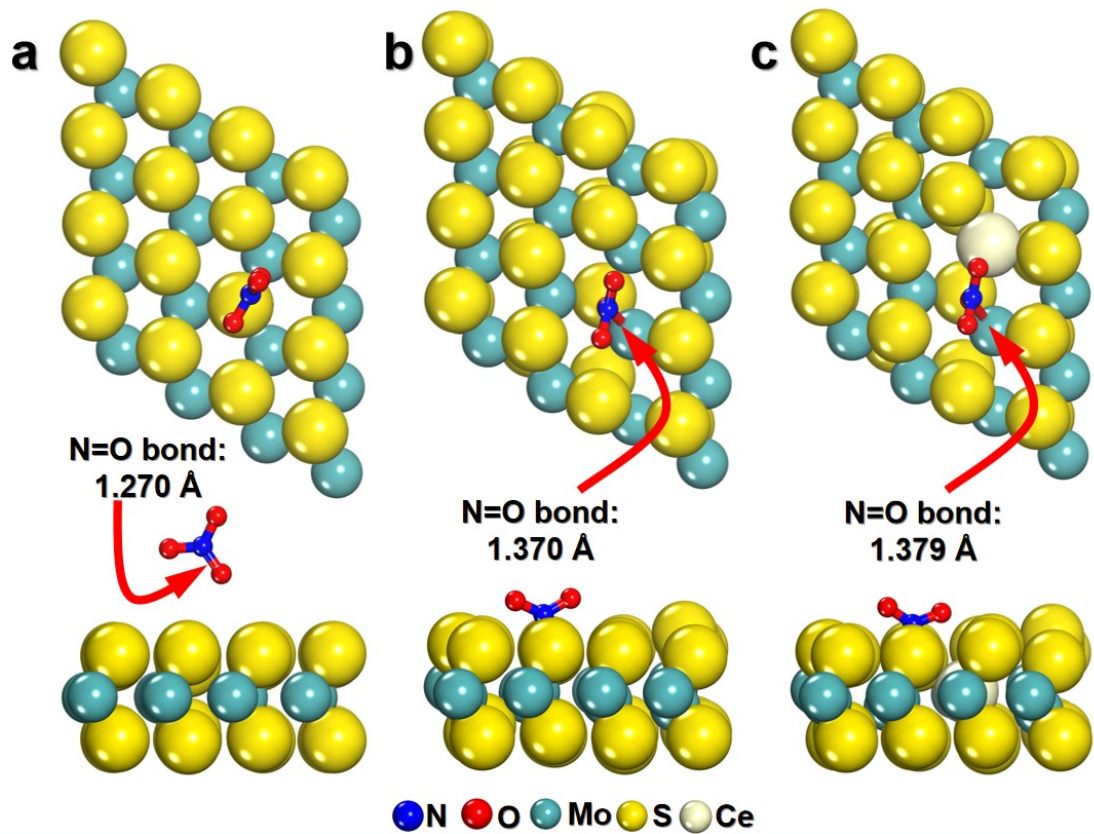

Fig. S12. Optimized structures of  $^*NO_3$  on pristine MoS<sub>2</sub>, MoS<sub>2-x</sub> and Ce-MoS<sub>2-x</sub>.

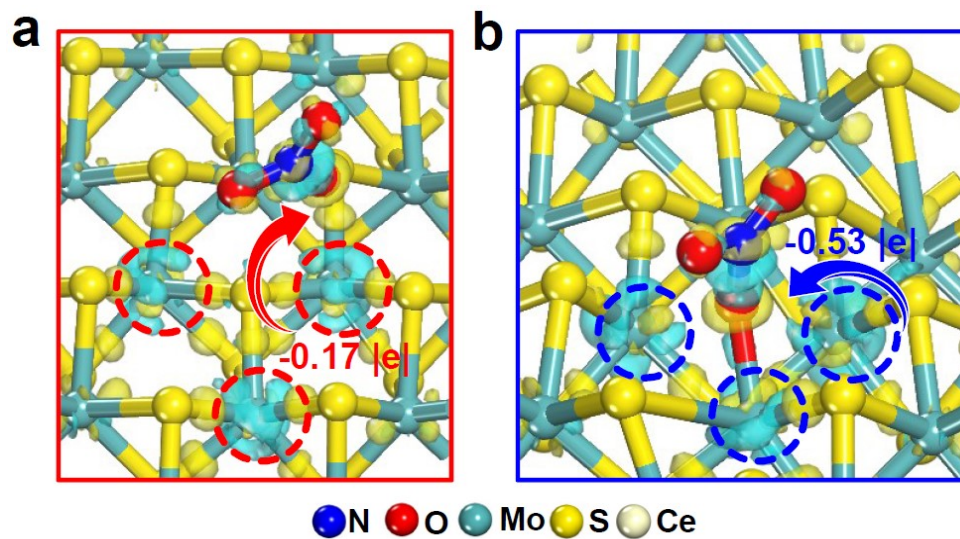

Fig. S13. Charge density difference plots of \*NO<sub>3</sub> on (a) MoS<sub>2</sub> and (b) MoS<sub>2-x</sub>.



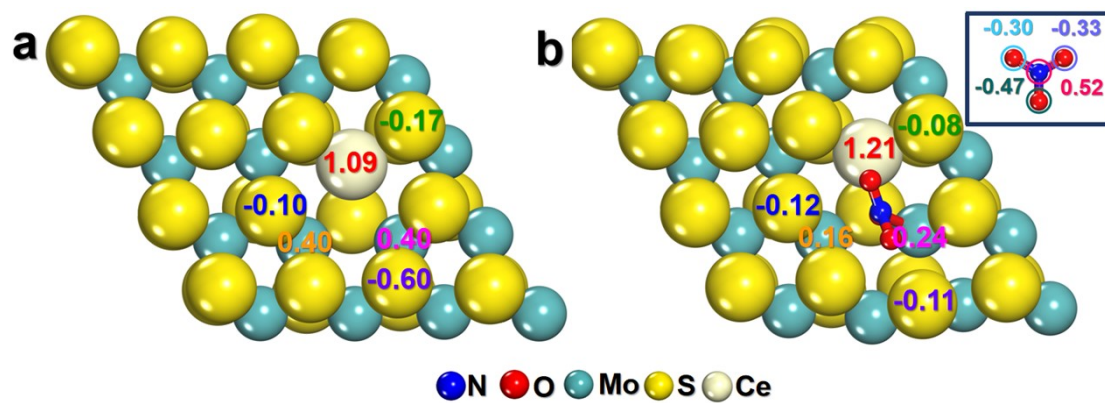

Fig. S14. Detailed charge analysis of (a) before and (b) after \*NO<sub>3</sub> on Ce-MoS<sub>2-x</sub>.

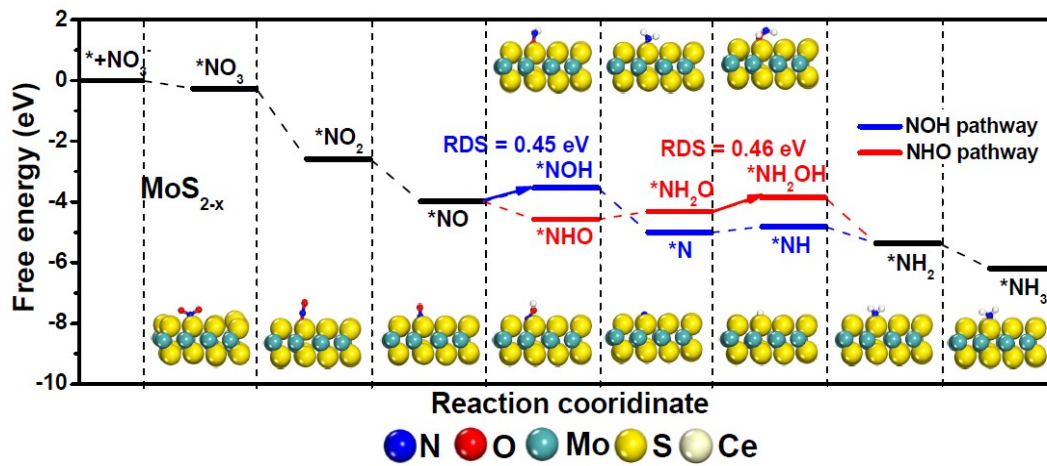

Fig. S15. Gibbs free energy diagrams of NO<sub>3</sub>RR on MoS<sub>2-x</sub>.

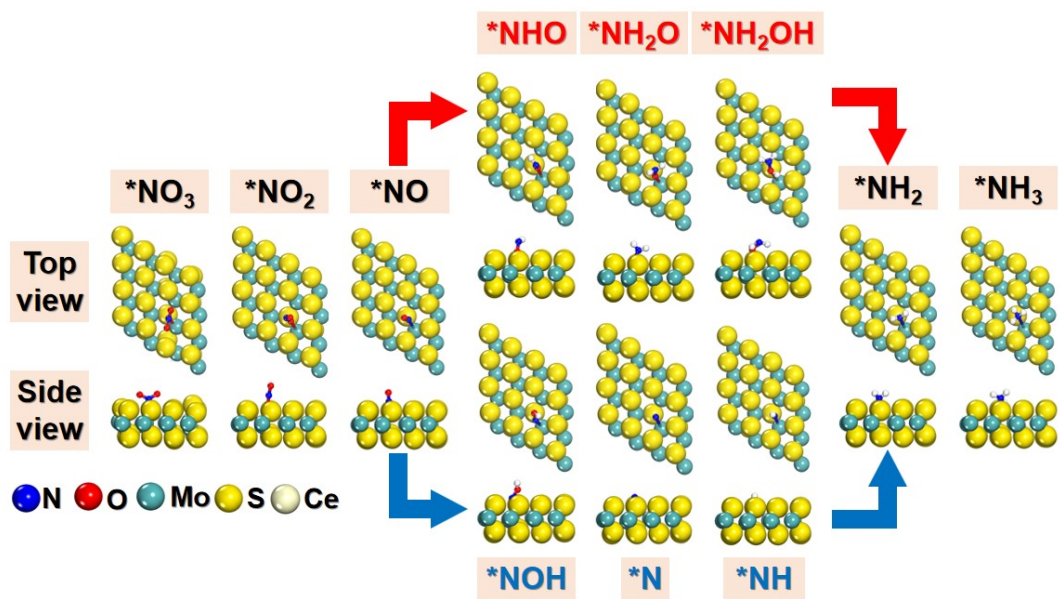

Fig. S16. Optimized structures of NO<sub>3</sub>RR intermediates on MoS<sub>2-x</sub>.

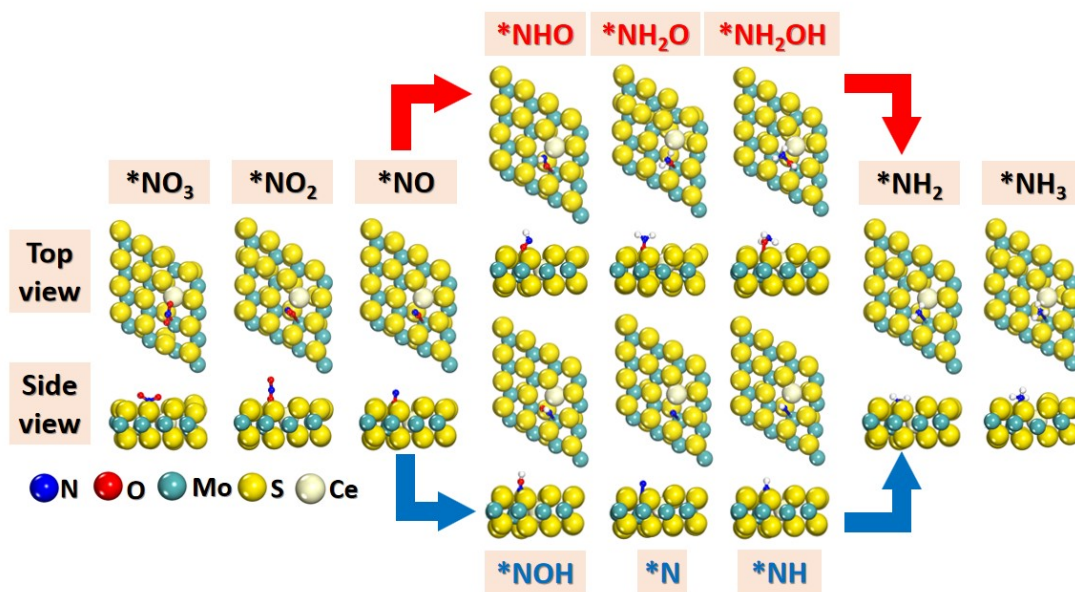

Fig. S17. Optimized structures of NO<sub>3</sub>RR intermediates on Ce-MoS<sub>2-x</sub>.

Table S1. Comparison of optimum NH<sub>3</sub> yield and Faradic efficiency (FE) for recently reported state-of-the-art NO<sub>3</sub>RR electrocatalysts at ambient conditions.

| Catalyst                                   | Electrolyte                                                                      | NH <sub>3</sub> yield rate                                                                                  | FE (%)      | Potential<br>(V vs RHE) | Ref.             |
|--------------------------------------------|----------------------------------------------------------------------------------|-------------------------------------------------------------------------------------------------------------|-------------|-------------------------|------------------|
| Fe-doped<br>Co <sub>3</sub> O <sub>4</sub> | 0.1 M PBS<br>(50 mM NO <sub>3</sub> <sup>-</sup> )                               | 0.62 mg h <sup>-1</sup> mg <sub>cat</sub> <sup>-1</sup>                                                     | 95.5        | -0.7                    | [3]              |
| TiO <sub>2-x</sub>                         | 0.5 M Na <sub>2</sub> SO <sub>4</sub><br>(50 ppm NO <sub>3</sub> <sup>-</sup> )  | 7.65 mg h <sup>-1</sup> mg <sub>cat</sub> <sup>-1</sup>                                                     | 85          | -0.6                    | [4]              |
| Fe <sub>3</sub> C/NC                       | 1 M KOH<br>(5 mM KNO <sub>3</sub> )                                              | 20.23 mg h <sup>-1</sup> mg <sub>cat</sub> <sup>-1</sup>                                                    | 96.7        | -0.5                    | [5]              |
| Fe-cyano NSs                               | 1 M KOH<br>(10 mM KNO <sub>3</sub> )                                             | 42.1 mg h <sup>-1</sup> mg <sub>cat</sub> <sup>-1</sup>                                                     | 90.2        | -0.5                    | [6]              |
| CuO NWAs                                   | 0.5 M Na <sub>2</sub> SO <sub>4</sub><br>(200 ppm NO <sub>3</sub> <sup>-</sup> ) | 4.16 mg h <sup>-1</sup> cm <sup>-2</sup>                                                                    | 95.8        | -0.85                   | [7]              |
| CoP/CC                                     | 1 M NaOH<br>(2mM NaNO <sub>3</sub> )                                             | 0.32 mg h <sup>-1</sup> cm <sup>-2</sup>                                                                    | 65          | -0.4                    | [8]              |
| Fe <sub>3</sub> O <sub>4</sub> /SS         | 0.1 M NaOH<br>(0.1 M NaNO <sub>3</sub> )                                         | 10.15 mg h <sup>-1</sup> cm <sup>-2</sup>                                                                   | 91.5        | -0.5                    | [9]              |
| Co <sub>2</sub> AlO <sub>4</sub> /CC       | 0.1 M PBS<br>(0.1 M NO <sub>3</sub> <sup>-</sup> )                               | 7.9 mg h <sup>-1</sup> cm <sup>-2</sup>                                                                     | 92.6        | -0.7                    | [10]             |
| ZnCo <sub>2</sub> O <sub>4</sub><br>NSA/CC | 0.1 M NaOH<br>(0.1 M NaNO <sub>3</sub> )                                         | 10.79 mg h <sup>-1</sup> cm <sup>-2</sup>                                                                   | 98.33       | -0.6                    | [11]             |
| Fe-MoS <sub>2</sub>                        | 0.1 M Na <sub>2</sub> SO <sub>4</sub><br>(0.1 M NaNO <sub>3</sub> )              | 0.51 mg h <sup>-1</sup> cm <sup>-2</sup>                                                                    | 98          | -0.48                   | [12]             |
| NiCo <sub>2</sub> O <sub>4</sub> /CC       | 0.1 M NaOH<br>(0.1M NaNO <sub>3</sub> )                                          | 16.54 mg h <sup>-1</sup> cm <sup>-2</sup>                                                                   | 99          | -0.3                    | [13]             |
| <b>Ce-MoS<sub>2-x</sub>/CC</b>             | <b>0.5 M Na<sub>2</sub>SO<sub>4</sub></b><br><b>(0.1 M NaNO<sub>3</sub>)</b>     | <b>7.3 mg h<sup>-1</sup> cm<sup>-2</sup></b><br><b>14.6 mg h<sup>-1</sup> mg<sub>cat</sub><sup>-1</sup></b> | <b>96.6</b> | <b>-0.7</b>             | <b>This work</b> |

---

## Supplementary references

- [1]. K. Chen, Y. Luo, P. Shen, X. Liu, X. Li, X. Li and K. Chu, *Dalton Trans.*, 2022, **51**, 10343-10350.
- [2]. S. J. Clark, M. D. Segall, C. J. Pickard, P. J. Hasnip, M. I. Probert, K. Refson and M. C. Payne, *Z Kristallogr Cryst Mater*, 2005, **220**, 567-570.
- [3]. P. Wei, J. Liang, Q. Liu, L. Xie, X. Tong, Y. Ren, T. Li, Y. Luo, N. Li, B. Tang, A. M. Asiri, M. S. Hamdy, Q. Kong, Z. Wang and X. Sun, *J. Colloid Interface Sci.*, 2022, **615**, 636-642.
- [4]. R. Jia, Y. Wang, C. Wang, Y. Ling, Y. Yu and B. Zhang, *ACS Catal.*, 2020, **10**, 3533-3540.
- [5]. Y. Wang, L. Zhang, Y. Niu, D. Fang, J. Wang, Q. Su and C. Wang, *Green Chem.*, 2021, **23**, 7594-7608.
- [6]. Z. Fang, Z. Jin, S. Tang, P. Li, P. Wu and G. Yu, *ACS nano*, 2021, **16**, 1072-1081.
- [7]. Y. Wang, W. Zhou, R. Jia, Y. Yu and B. Zhang, *Angew. Chem., Int. Ed.*, 2020, **59**, 5350-5354.
- [8]. H. Zhang, G. Wang, C. Wang, Y. Liu, Y. Yang, C. Wang, W. Jiang, L. Fu and J. Xu, *J. Electroanal. Chem.*, 2022, **910**, 116171.
- [9]. X. Fan, L. Xie, J. Liang, Y. Ren, L. Zhang, L. Yue, T. Li, Y. Luo, N. Li, B. Tang, Y. Liu, S. Gao, A. A. Alshehri, Q. Liu, Q. Kong and X. Sun, *Nano Res.*, 2021, **15**, 3050-3055.
- [10]. Z. Deng, J. Liang, Q. Liu, C. Ma, L. Xie, L. Yue, Y. Ren, T. Li, Y. Luo, N. Li, B. Tang, A. A. Alshehri, I. Shakir, P. O. Agboola, S. Yan, B. Zheng, J. Du, Q. Kong and X. Sun, *Chem. Eng. J.*, 2022, **435**, 135104.
- [11]. Z. Li, J. Liang, Q. Liu, L. Xie, L. Zhang, Y. Ren, L. Yue, N. Li, B. Tang, A. A. Alshehri, M. S. Hamdy, Y. Luo, Q. Kong and X. Sun, *Mater. Today Phys.*, 2022, **23**, 100619.
- [12]. J. Li, Y. Zhang, C. Liu, L. Zheng, E. Petit, K. Qi, Y. Zhang, H. Wu, W. Wang and A. Tiberj, *Adv. Funct. Mater.*, 2022, **32**, 2108316.
- [13]. Q. Liu, L. Xie, J. Liang, Y. Ren, Y. Wang, L. Zhang, L. Yue, T. Li, Y. Luo, N. Li, B. Tang, L. Yang, S. Gao, A. A. Alshehri, I. Shakir, P. O. Agboola, Q. Kong, Q. Wang, D. Ma and X. Sun, *Small*, 2022, **18**, 2106961.
